# Supplementary material for: Single cell atlas of Xenoturbella bocki highlights limited cell-type complexity
Source: PubMed Central journal article supplement (PMC10951248; doi:10.1038/s41467-024-45956-y), 2024-03-19
Supplement: 41467_2024_45956_MOESM1_ESM.pdf [file 41467_2024_45956_MOESM1_ESM.pdf]

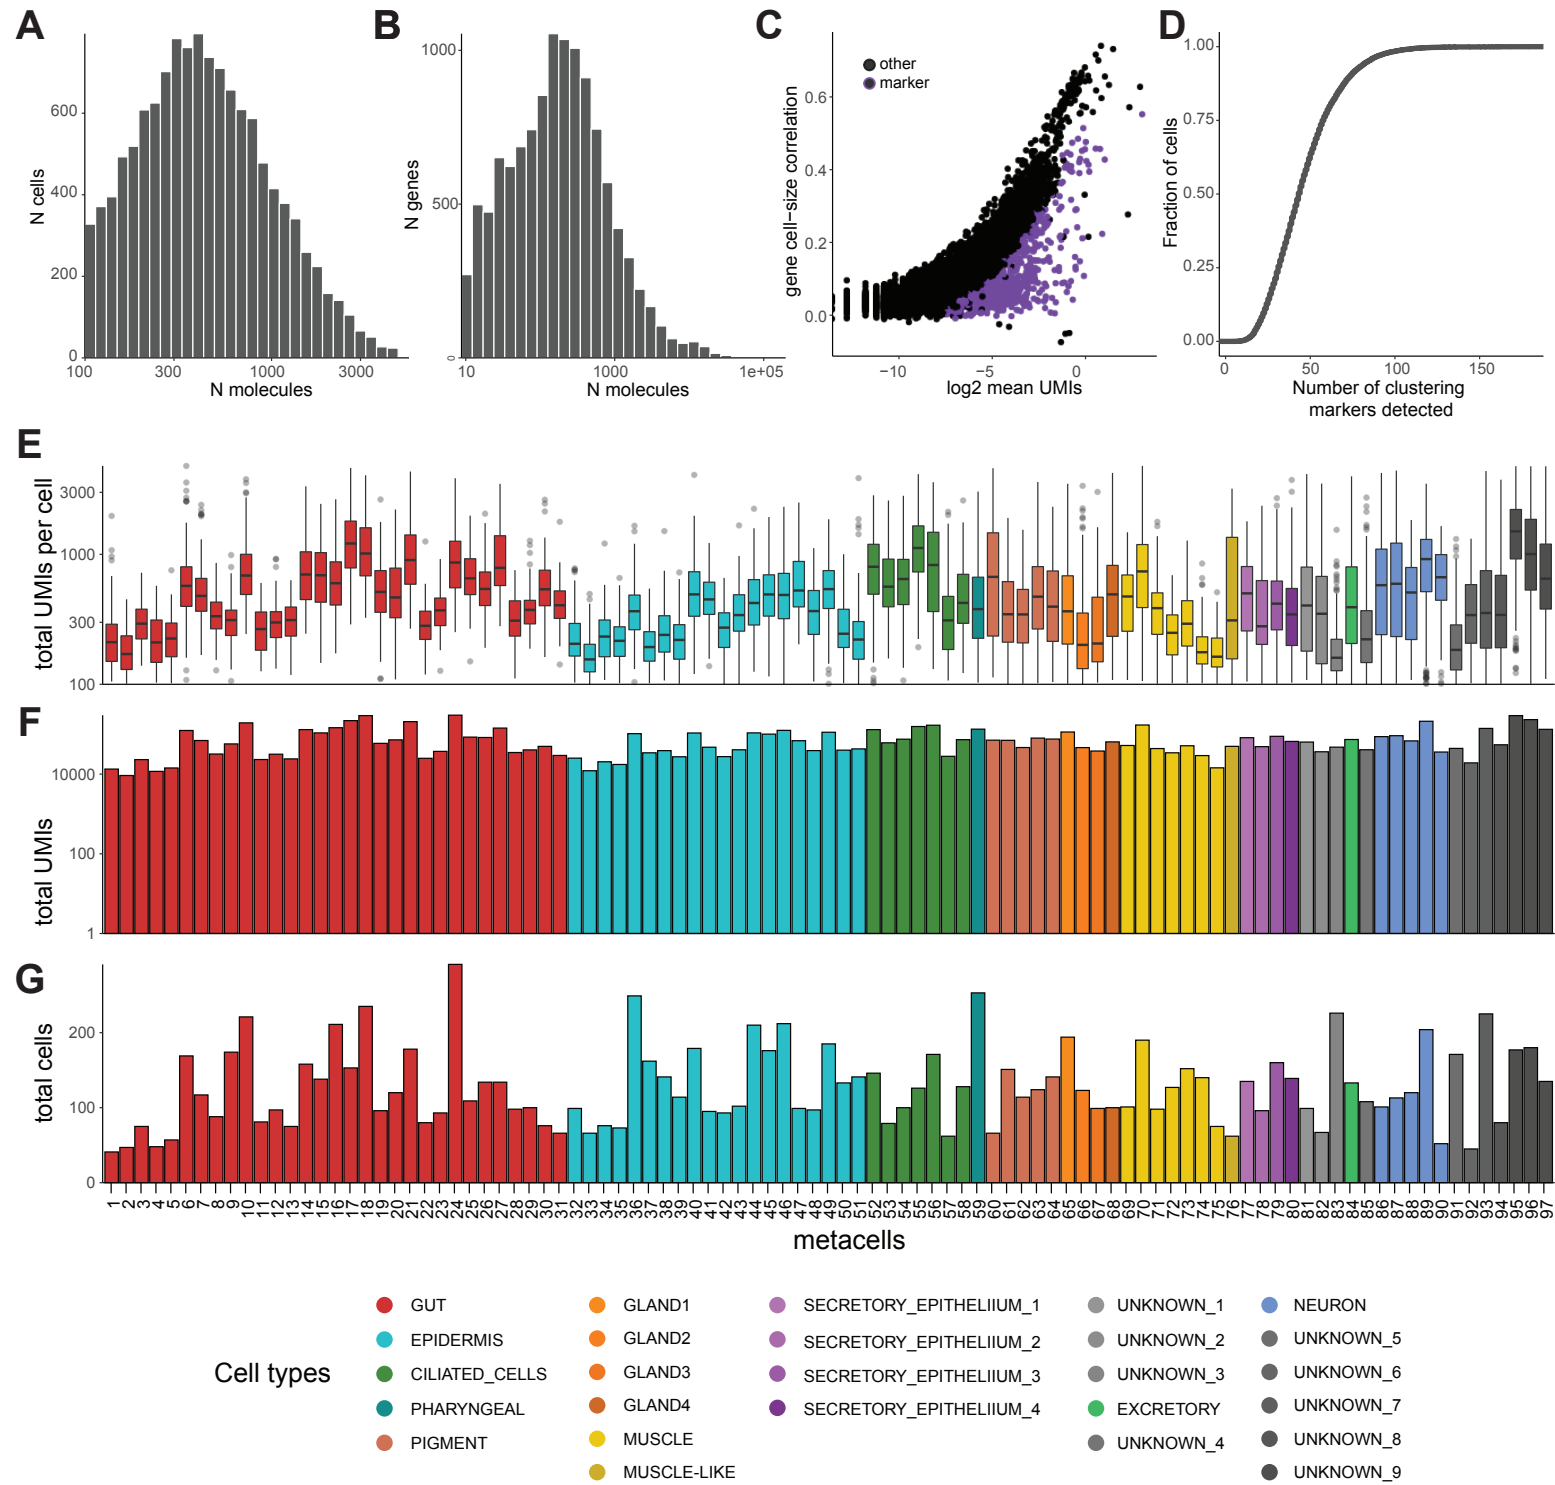

**Figure S1. *Xenoturbella* scRNA-seq atlas statistics.**

**a** Distribution of total RNA molecules per cell. **b** Distribution of total RNA molecules per gene.

**c** Relationship between gene total expression (x axis) and the correlation between gene expression and total RNA molecules per cell (y axis). Marker genes selected for cell clustering are shown in purple.

**d** Cumulative distribution of number of marker genes detected per single cell. **e** Distribution of RNA molecules per cell per metacell. **f** Total number of RNA molecules per metacell. **g** Number of cells per metacell.

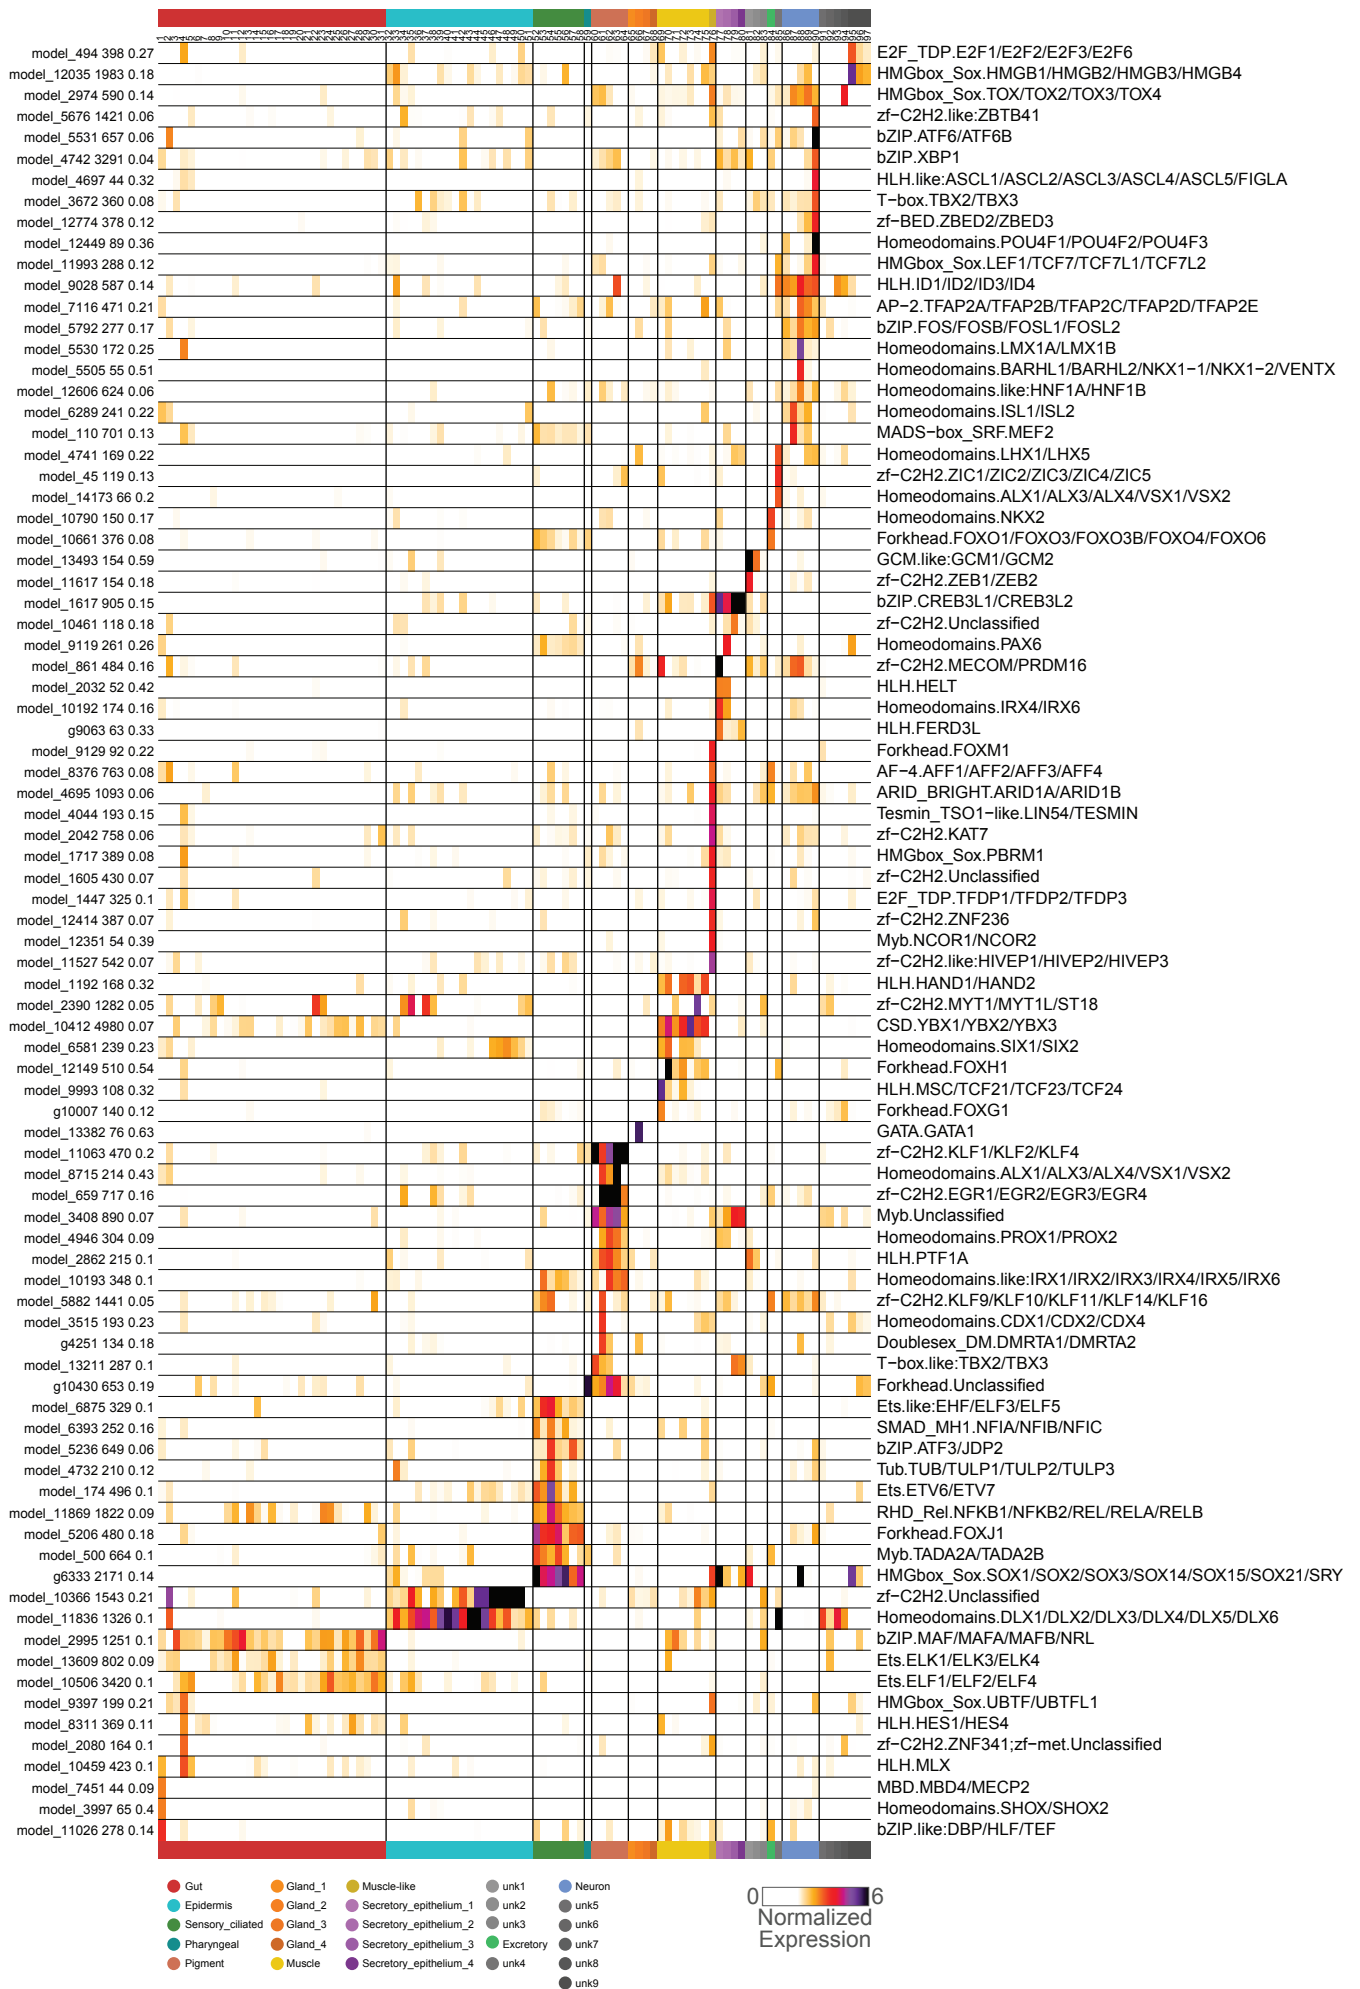

**Figure S2. Transcription factor expression profile across *Xenoturbella* metacells.** On the right side, the structural class and the phylogeny-based family classification for each TF is indicated. Cell type annotations are colour-coded above/below the heatmap.

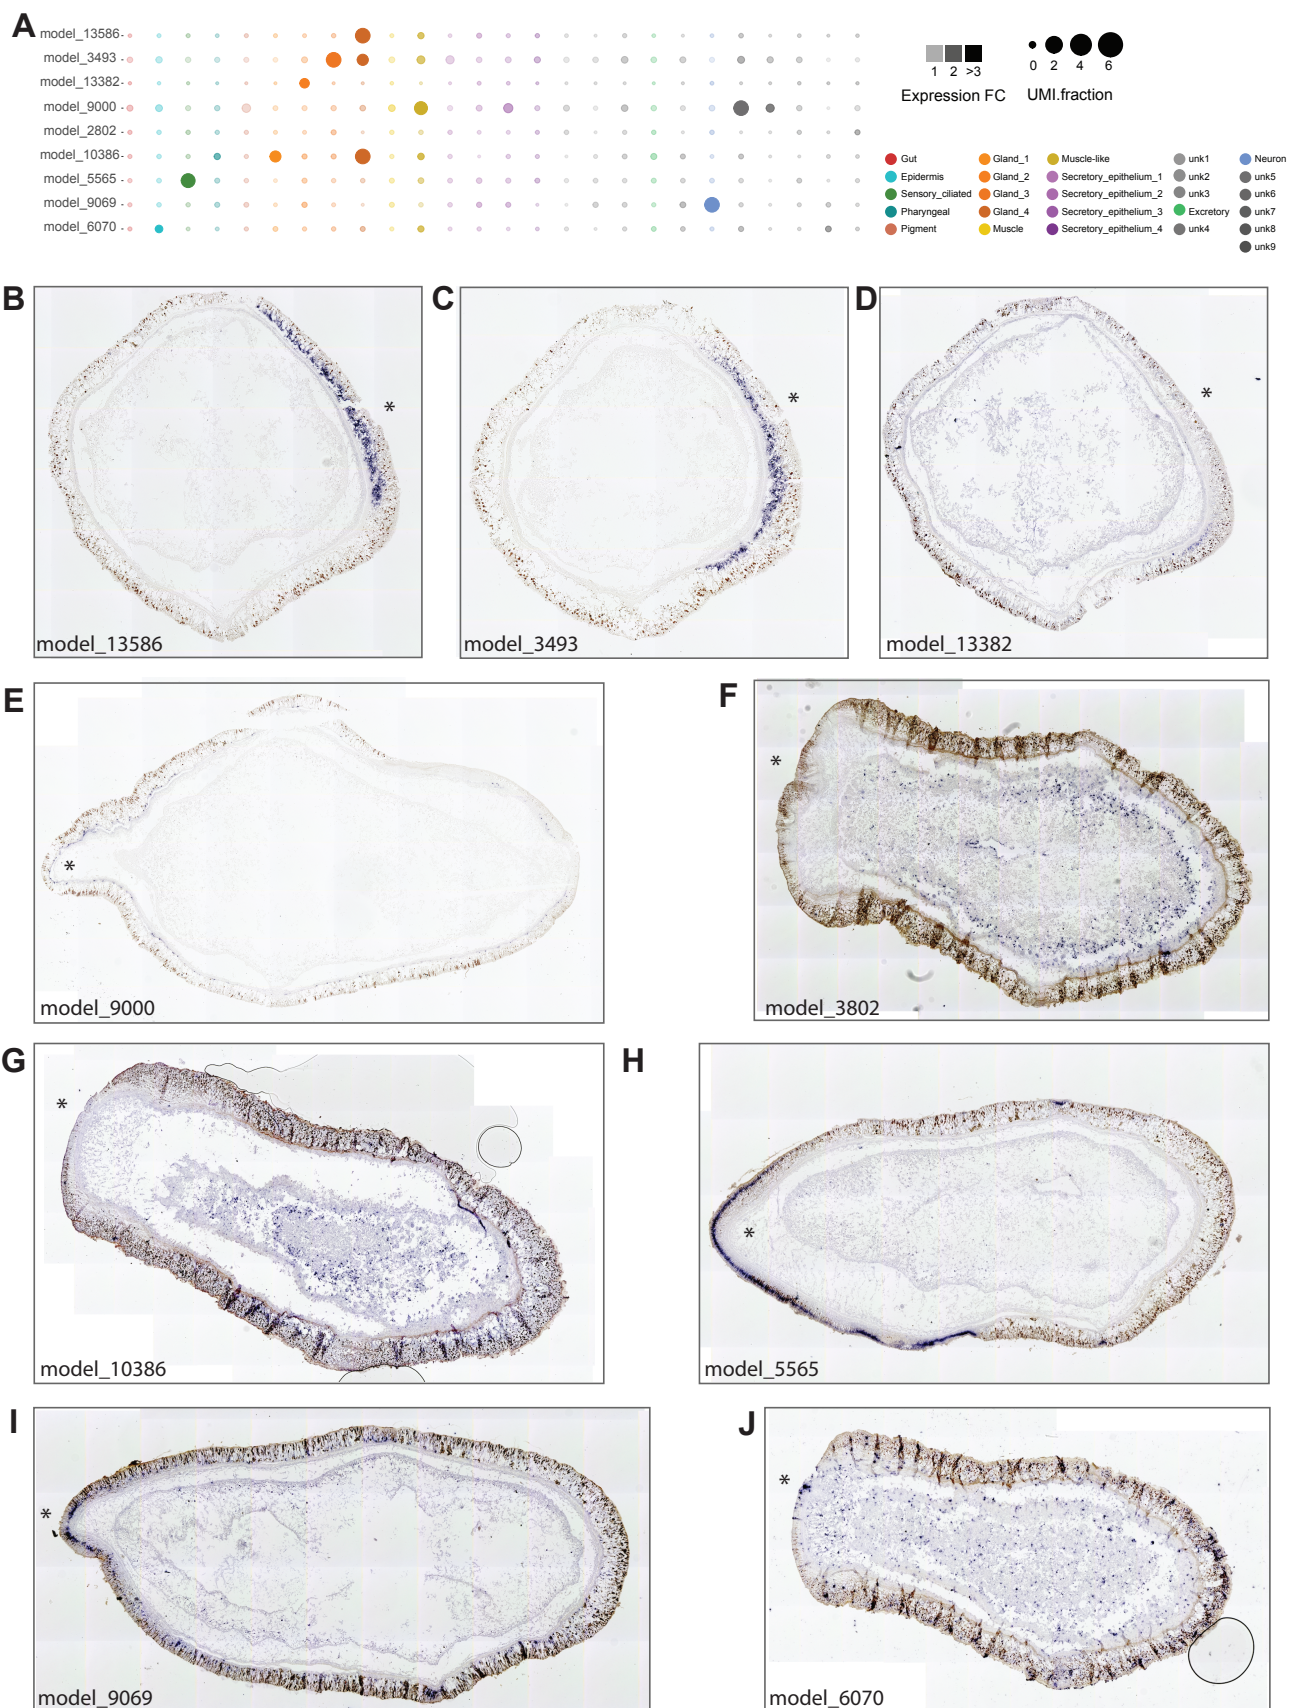

**Figure S3. Additional markers validated by ISH.**

**a** Dot plot of additional genes included for ISH across metacells. **b** ISH for Xb model\_13586, expression localised to the basal portion of the epidermis in the anterior of the animal. In all panels, the anterior of the animals is indicated by \*. **c** ISH for Xb model\_3493, expression localised to the basal portion of the epidermis in the anterior of the animal. **d** ISH for Xb model\_13382 (GATA3), expression localised to a specific patch of cells in the anterior epidermis. Probes for **b**, **c** and **d** all correspond to genes specifically expressed in three different gland populations. **e** ISH for Xb model\_9000 localising to specific cells in the apical portion of the muscle. **f** ISH for Xb model\_3802, localising to the gut. **g** ISH for Xb model\_10386, localising to digestive gland cells. **h** ISH for Xb model\_5565, expression in the ciliary furrow and the nerve plexus in the anterior region of the section. **i** ISH for Xb model\_9069 (adenosine receptor), expression in nerve plexus in anterior of section. **j** ISH for Xb model\_6070, broadly expressed across the gut and in the epidermis

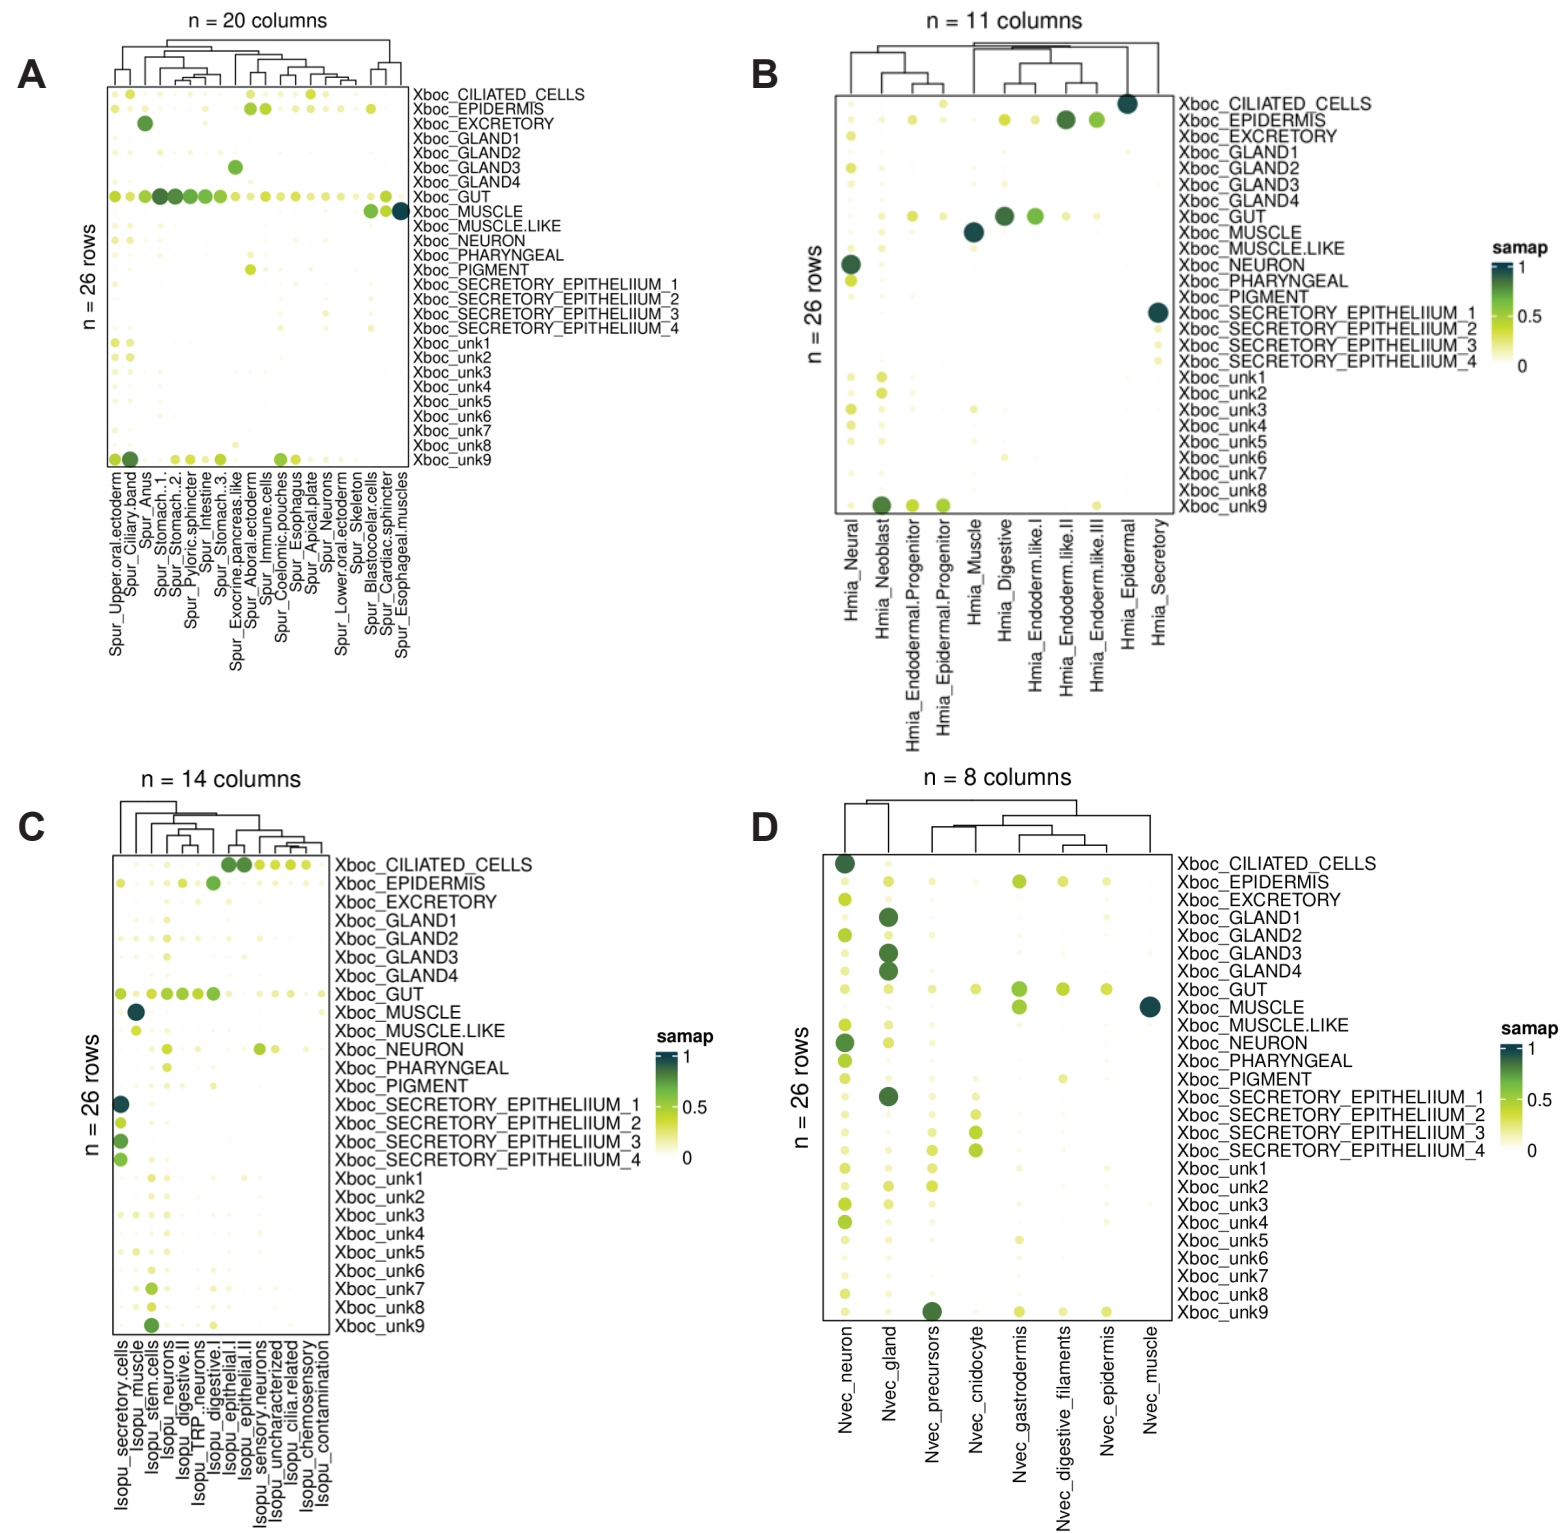

**Figure S4. Cross-Species Analysis of Cell Cluster Similarity.**

SAMap similarity analysis was performed according to <sup>50</sup> pairwise on the *Xenoturbella* scRNA-seq data and publicly available data <sup>30,31,37,51</sup> from **a** sea urchin **b** *H. miamia* (acoel) **c** *I. pulchra* (acoel) and **d** *N. vectensis* (sea anemone).

| Batch                        | Specimen   | Nreads   | Nmolecules | Median_reads_per_cell | Perc_mapping | 10_percentile_umis | 50_percentile_umis | 90_percentile_umis | N_cells_over100umis |
|------------------------------|------------|----------|------------|-----------------------|--------------|--------------------|--------------------|--------------------|---------------------|
| a170424_XbA1_P01A            | Specimen_1 | 9894088  | 153863     | 28358                 | 27.93        | 136                | 458                | 1865               | 184                 |
| a170424_XbA1_P01H            | Specimen_1 | 13730108 | 203218     | 37713                 | 25.81        | 154                | 650                | 2447               | 187                 |
| a170424_XbA1_P02A            | Specimen_1 | 22500828 | 101164     | 61624                 | 15.72        | 140                | 351                | 1065               | 181                 |
| a170424_XbA1_P02H            | Specimen_1 | 22144325 | 129182     | 49120.5               | 17.61        | 181                | 432                | 1405               | 188                 |
| a170424_XbA1_P03A            | Specimen_1 | 21224874 | 126071     | 58959                 | 24.15        | 106                | 372                | 1651               | 179                 |
| a170424_XbA1_P03H            | Specimen_1 | 15472882 | 100117     | 50619.5               | 24.42        | 168                | 430                | 970                | 187                 |
| a170424_XbA1_P04A            | Specimen_1 | 40950905 | 230287     | 106276.5              | 26.58        | 365                | 852                | 2164               | 191                 |
| a170424_XbA1_P04H            | Specimen_1 | 16184610 | 123248     | 39094.5               | 29.14        | 137                | 348                | 1529               | 179                 |
| a170424_XbA1_P05A            | Specimen_1 | 12529655 | 116387     | 43000.5               | 25.23        | 102                | 430                | 1291               | 173                 |
| a170424_XbA1_P05H            | Specimen_1 | 9408009  | 111364     | 26592                 | 22.18        | 92                 | 362                | 1340               | 172                 |
| a170424_XbA1_P06A            | Specimen_1 | 13722265 | 163154     | 43208                 | 25.15        | 188                | 598                | 1621               | 182                 |
| a170424_XbA1_P06H            | Specimen_1 | 9158398  | 129653     | 23047                 | 25.58        | 103                | 352                | 1729               | 174                 |
| a170424_XbA1_P07A            | Specimen_1 | 10649461 | 126825     | 27714.5               | 23.45        | 126                | 382                | 1534               | 180                 |
| a170424_XbA1_P07H            | Specimen_1 | 11965341 | 130081     | 35948.5               | 22.01        | 133                | 430                | 1579               | 182                 |
| a170424_XbA1_P08A            | Specimen_1 | 10222890 | 138738     | 29288.5               | 24.96        | 131                | 412                | 1750               | 178                 |
| a170424_XbA1_P08H            | Specimen_1 | 13884937 | 110333     | 36650.5               | 23.02        | 99                 | 366                | 1148               | 171                 |
| a170424_XbA1_P09A            | Specimen_1 | 8906340  | 112226     | 26790.5               | 24.14        | 182                | 414                | 1337               | 184                 |
| a170424_XbA1_P09H            | Specimen_1 | 7346216  | 112143     | 21148                 | 21.71        | 112                | 390                | 1206               | 176                 |
| a170424_XbA1_P10A            | Specimen_1 | 10172198 | 147371     | 28662                 | 24.9         | 195                | 554                | 1650               | 190                 |
| a170424_XbA1_P10H            | Specimen_1 | 9211564  | 122133     | 24445.5               | 22.49        | 131                | 439                | 1389               | 184                 |
| a170424_XbA1_P11A            | Specimen_1 | 8215636  | 111502     | 25242.5               | 23.09        | 154                | 382                | 1166               | 186                 |
| a170424_XbA1_P11H            | Specimen_1 | 5791725  | 68559      | 15620                 | 20.53        | 77                 | 233                | 847                | 160                 |
| a170424_XbA1_P12A            | Specimen_1 | 8806539  | 141467     | 28497                 | 22.76        | 212                | 495                | 1506               | 189                 |
| a170424_XbA1_P12H            | Specimen_1 | 8165938  | 117840     | 24157.5               | 18.79        | 159                | 484                | 1371               | 181                 |
| a170424_XbA1_P13A            | Specimen_1 | 9180312  | 110181     | 20721.5               | 21.47        | 117                | 325                | 1425               | 177                 |
| a170424_XbA1_P13H            | Specimen_1 | 8042273  | 92643      | 22302                 | 21.72        | 89                 | 369                | 998                | 171                 |
| a170424_XbA1_P14A            | Specimen_1 | 13757652 | 131110     | 48557                 | 19.15        | 229                | 557                | 1283               | 190                 |
| a170424_XbA1_P14H            | Specimen_1 | 15907477 | 120752     | 44515                 | 20.7         | 122                | 434                | 1330               | 183                 |
| a170424_XbA1_P15A            | Specimen_1 | 11563243 | 97776      | 33607                 | 21.76        | 113                | 392                | 1093               | 179                 |
| a170424_XbA1_P15H            | Specimen_1 | 14950290 | 97629      | 34124.5               | 19.16        | 113                | 356                | 1205               | 178                 |
| a170424_XbA1_P16A            | Specimen_1 | 10020110 | 68479      | 30807.5               | 23.9         | 97                 | 261                | 750                | 171                 |
| a170424_XbA1_P16H            | Specimen_1 | 7129941  | 64959      | 23773                 | 24.6         | 81                 | 242                | 650                | 162                 |
| a171115_Xb_A1_P01A           | Specimen_2 | 18455452 | 85082      | 63357                 | 19.79        | 88                 | 306                | 776                | 169                 |
| a171115_Xb_A1_P01H           | Specimen_2 | 13489438 | 101010     | 49072                 | 20.48        | 147                | 424                | 918                | 178                 |
| a171115_Xb_A1_P02A           | Specimen_2 | 17915618 | 112134     | 51791.5               | 19.84        | 199                | 428                | 939                | 182                 |
| a171115_Xb_A1_P02H           | Specimen_2 | 12145265 | 58307      | 42479                 | 20.14        | 58                 | 236                | 556                | 160                 |
| a171115_Xb_A1_P03A           | Specimen_2 | 14360748 | 65837      | 58157.5               | 23.02        | 120                | 309                | 604                | 176                 |
| a171115_Xb_A1_P03H           | Specimen_2 | 14802290 | 76127      | 49332.5               | 22.24        | 92                 | 331                | 737                | 171                 |
| a171115_Xb_A1_P04A           | Specimen_2 | 13244593 | 57922      | 42798                 | 23.67        | 105                | 236                | 515                | 174                 |
| a171115_Xb_A1_P04H           | Specimen_2 | 18543530 | 73314      | 72036.5               | 25.64        | 110                | 316                | 693                | 175                 |
| a171115_Xb_A1_P05A           | Specimen_2 | 17048733 | 75954      | 67606                 | 18.77        | 172                | 346                | 707                | 182                 |
| a171115_Xb_A1_P05H           | Specimen_2 | 18489921 | 57535      | 69703.5               | 17.28        | 70                 | 234                | 573                | 166                 |
| a171115_Xb_A1_P06A           | Specimen_2 | 8747756  | 57268      | 35108.5               | 22.38        | 117                | 260                | 510                | 174                 |
| a171115_Xb_A1_P06H           | Specimen_2 | 17145155 | 60775      | 67289                 | 22.6         | 83                 | 267                | 530                | 167                 |
| a171115_Xb_A1_P07A           | Specimen_2 | 17164694 | 67803      | 36050                 | 10.64        | 98                 | 288                | 667                | 172                 |
| a171115_Xb_A1_P07H           | Specimen_2 | 14324461 | 60999      | 47235.5               | 18.87        | 69                 | 276                | 598                | 161                 |
| a171115_Xb_A1_P08A           | Specimen_2 | 14391963 | 64266      | 56108                 | 24.74        | 136                | 310                | 557                | 177                 |
| a171115_Xb_A1_P08H           | Specimen_2 | 16238039 | 66747      | 61813                 | 25.7         | 108                | 280                | 631                | 175                 |
| a171115_Xb_A1_P09A           | Specimen_3 | 21039895 | 269545     | 87805                 | 20.8         | 290                | 1132               | 2960               | 189                 |
| a171115_Xb_A1_P09H           | Specimen_3 | 15716597 | 197192     | 60947.5               | 19.26        | 183                | 912                | 2260               | 183                 |
| aRP0092A_170425_Xb_A3_IX17   | Specimen_3 | 6920821  | 172162     | 14499                 | 34.5         | 172                | 401                | 1204               | 191                 |
| aRP0092H_170425_Xb_A3_IX18   | Specimen_3 | 7390181  | 222766     | 14566.5               | 37.59        | 192                | 486                | 1328               | 190                 |
| aRP0093A_170425_Xb_A3_IX19   | Specimen_3 | 5161353  | 90702      | 13145.5               | 32.95        | 125                | 296                | 1090               | 185                 |
| aRP0093H_170425_Xb_A3_IX20   | Specimen_3 | 6464864  | 115591     | 17993.5               | 37.53        | 122                | 330                | 1243               | 185                 |
| aRP0094A_170425_Xb_A3_IX21   | Specimen_3 | 5981757  | 78204      | 15451                 | 22.79        | 118                | 256                | 899                | 182                 |
| aRP0094H_170425_Xb_A3_IX22   | Specimen_3 | 5208645  | 85530      | 12283                 | 26.8         | 103                | 225                | 1009               | 175                 |
| aRP0095A_170425_Xb_A3_IX23   | Specimen_3 | 6503734  | 112615     | 18286                 | 24.12        | 169                | 388                | 1168               | 191                 |
| aRP0095H_170425_Xb_A3_IX24   | Specimen_3 | 6768486  | 134159     | 19177                 | 28.2         | 195                | 444                | 1522               | 191                 |
| aRP0096A_170425_Xb_A3_IX25   | Specimen_3 | 5978594  | 127916     | 15201                 | 23.12        | 113                | 234                | 1060               | 179                 |
| aRP0096H_170425_Xb_A3_IX26   | Specimen_3 | 7784085  | 638331     | 3666                  | 28.75        | 147                | 273                | 890                | 190                 |
| aRP0097A_170425_Xb_A3_IX27   | Specimen_3 | 6542369  | 102021     | 17165.5               | 24.18        | 109                | 303                | 1097               | 181                 |
| aRP0097H_170425_Xb_A3_IX28   | Specimen_3 | 6054683  | 97336      | 15599                 | 26.67        | 108                | 258                | 1119               | 175                 |
| aRP0098A_170425_Xb_A3_IX29   | Specimen_3 | 5443345  | 106601     | 13023.5               | 29.01        | 107                | 247                | 1427               | 176                 |
| aRP0098H_170425_Xb_A3_IX30   | Specimen_3 | 6355872  | 121442     | 14816.5               | 29.67        | 137                | 368                | 1384               | 187                 |
| aRP0099A_170425_Xb_A3_IX31   | Specimen_3 | 5792604  | 112945     | 15576.5               | 30.47        | 112                | 308                | 1321               | 178                 |
| aRP0099H_170425_Xb_A3_IX32   | Specimen_3 | 6151549  | 117541     | 15309                 | 31.85        | 129                | 310                | 1396               | 186                 |
| aRP0545A_180504_Xb_A5_SpT4_i | Specimen_4 | 7377256  | 155622     | 23181                 | 32.09        | 160                | 552                | 1627               | 185                 |
| aRP0545H_180504_Xb_A5_SpT4_i | Specimen_4 | 6704298  | 129863     | 23125                 | 29.06        | 203                | 490                | 1289               | 188                 |
| aRP0546A_180504_Xb_A5_SpT4_i | Specimen_4 | 6080463  | 106701     | 20588                 | 26.9         | 129                | 390                | 1178               | 182                 |
| aRP0546H_180504_Xb_A5_SpT4_i | Specimen_4 | 7619165  | 128028     | 25338                 | 29.12        | 172                | 492                | 1411               | 189                 |
| aRP0555A_180504_Xb_A5_SpT10  | Specimen_4 | 7523015  | 117890     | 25441                 | 27.18        | 79                 | 419                | 1322               | 169                 |
| aRP0555H_180504_Xb_A5_SpT10  | Specimen_4 | 6851313  | 125417     | 24657                 | 27.65        | 176                | 500                | 1358               | 186                 |
| aRP0556A_180504_Xb_A5_SpT10  | Specimen_4 | 5920447  | 152087     | 20973.5               | 27.9         | 208                | 606                | 1577               | 189                 |
| aRP0556H_180504_Xb_A5_SpT10  | Specimen_4 | 6260769  | 125899     | 24221.5               | 29.76        | 125                | 522                | 1252               | 180                 |
| aRP0561A_180504_Xb_A5_nST4_i | Specimen_4 | 7434722  | 165367     | 23815                 | 30.29        | 163                | 658                | 1690               | 187                 |
| aRP0561H_180504_Xb_A5_nST4_i | Specimen_4 | 6075556  | 145153     | 19555                 | 28.61        | 116                | 460                | 1661               | 178                 |
| aRP0562A_180504_Xb_A5_nST4_i | Specimen_4 | 8233399  | 175883     | 29654                 | 27.71        | 269                | 674                | 1713               | 190                 |
| aRP0562H_180504_Xb_A5_nST4_i | Specimen_4 | 4692576  | 86736      | 15794.5               | 27.31        | 64                 | 313                | 1023               | 146                 |
| aRP0571A_180504_Xb_A5_nST10  | Specimen_4 | 6585865  | 132267     | 20765.5               | 29.09        | 168                | 476                | 1325               | 188                 |
| aRP0571H_180504_Xb_A5_nST10  | Specimen_4 | 6807004  | 137294     | 23856.5               | 28.13        | 163                | 462                | 1376               | 183                 |
| aRP0572A_180504_Xb_A5_nST10  | Specimen_4 | 6523694  | 162614     | 22608                 | 29.75        | 207                | 615                | 1665               | 188                 |
| aRP0572H_180504_Xb_A5_nST10  | Specimen_4 | 8302002  | 155294     | 29133                 | 26.29        | 167                | 618                | 1694               | 187                 |

Table S1. Metadata associated with each half-plate of single cell RNA-seq samples.

| Model | Forward primer           | Reverse primer          |
|-------|--------------------------|-------------------------|
| 13733 | ACGATTGGTGCCAAGAAAAC     | TTAAATGGGAATGGCTCGTC    |
| 8649  | ATCGCAATCGCAGAATTCAA     | TTAGGCCTAGTCCAGTGACACAT |
| 3275  | GTACATACGCATCTCCGCTCATC  | AATACATTCCAACGGTCCTCCTC |
| 4365  | ATAGCTGAGTCGCGCATAACAT   | AATTCAGCCGCTCGTTCCTTAG  |
| 3304  | ACACAGAGACAGCTGGTGATGCT  | GCTAACATATCCGACCAATGACG |
| 8066  | CGCTGGTAGAACTGGAATACAGC  | TGGATGGTCTCTCTTGATTGTCC |
| 179   | ACTTCAACACACGACGCAATCTT  | GCATATGCACGTGAACACGAA   |
| 14024 | CGAACGAGTCGGTTGAACAATA   | ATGAACGCGTGATGATGAGTAGG |
| 7170  | GAAGGAGTATCACAGCGATGGAA  | GGTGCAAGGAACTGATTATGGTG |
| 5206  | GACCCAAAGGTCGTTGTCAT     | GTTGGAACGCGATCAATTTT    |
| 13586 | CGAGACATACGGCAGCATTC     | CGGAGCGAAACTGACAATGT    |
| 13382 | ACGCGATCGGTCGATACTAC     | GGCGAATTTCAAAGTGTCGT    |
| 9000  | CAACATCGGGAACAGTGTGC     | GTTTGCCCAAGAAACGAAACG   |
| 5565  | GATCTCGTCCAGGATGAAGGTCT  | CCGTGCAAGAGATATGTTCAATG |
| 3802  | GGATCTCCTAACCAACAATTGCTT | GGTCAACCTCCATCAAGTGCAG  |
| 9069  | AACTCGGACTCAACGCTTCAACT  | GCGTTCAATTGATTCTCGTAGA  |
| 6070  | GCAATGGACTACCAATGGACAAC  | ACGACATTATCACCGTCACGTCT |
| 3493  | TTGTGGTTGTGGTTGGAGAG     | ACATTATCAGGGGACGGTGT    |
| 10386 | TTCACCGTGCACTACTCAACTCA  | TGGCCTAATATGAGCGGACTGTA |

**Table S2. Primer sequences used to amplify DNA templates for RNA *in situ* hybridization experiments**
