# Supplementary material for: Single cell atlas of Xenoturbella bocki highlights limited cell-type complexity
Source: PubMed Central journal article supplement (PMC10951248; doi:10.1038/s41467-024-45956-y), 2024-03-19
Supplement: 41467_2024_45956_MOESM3_ESM.pdf [file 41467_2024_45956_MOESM3_ESM.pdf]

## **Description of Additional Supplementary Files**

File Name: Supplementary Data 1

Description: Xenoturbella\_metacell\_gene\_expression

File Name: Supplementary Data 2

Description: Xenoturbella\_metacell\_UMI\_counts
